# Supplementary material for: Discovery of FtsZ inhibitors by virtual screening as antibacterial agents and study of the inhibition mechanism
Source: Royal Society of Chemistry journal article supplement (doi:10.1039/d1md00249j), 2021-11-15
Supplement: d1md00249j1.pdf [file d1md00249j1.pdf]

## Supplementary Materials

### Discovery of FtsZ inhibitors by virtual screening as antibacterial agents and study of the inhibition mechanism

Ruo-Lan Du, Ning Sun, Yik-Hong Fung, Yuan-Yuan Zheng, Yu-Wei Chen, Pak-Ho Chan, Wing-Leung Wong and Kwok-Yin Wong\*

Department of Applied Biology and Chemical technology and the State Key Laboratory of Chemical Biology and Drug Discovery,  
The Hong Kong Polytechnic University, Hunghom, Kowloon, Hong Kong, P. R. China.

\* Corresponding author

E-mail:

kwok-yin.wong@polyu.edu.hk

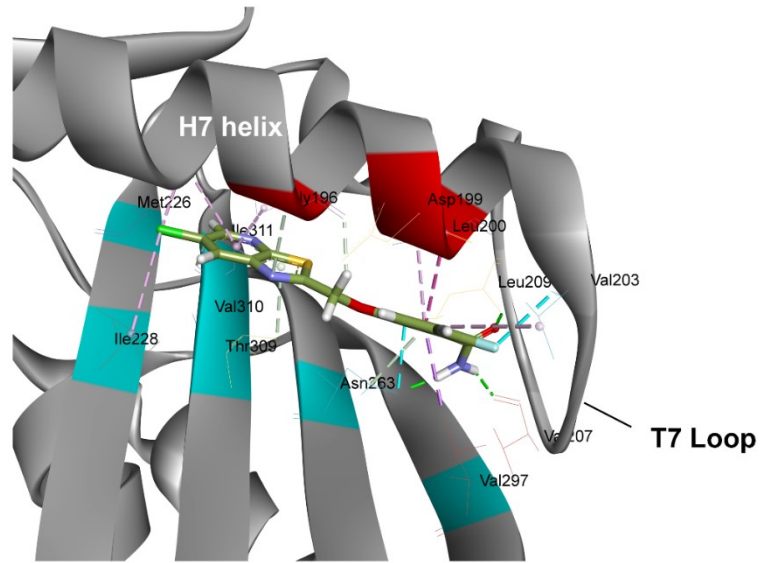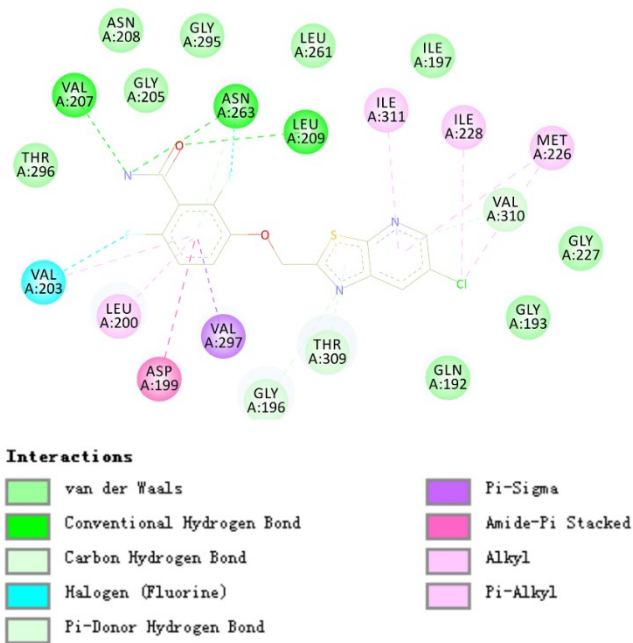

Figure 1 The binding mode of PC190723 with *S. aureus* FtsZ (PDB ID: 4DXD) and the interactions between PC190723 with the amino acids involved in the hot spot in a 2-D format.
